# Supplementary material for: Dopamine signaling enriched striatal gene set predicts striatal dopamine synthesis and physiological activity in vivo
Source: Springer Nature journal article supplement (doi:10.1038/s41467-024-47456-5), 2024-04-30
Supplement: MOESM1 [file 41467_2024_47456_MOESM1_ESM.pdf]

1 **Supplementary Information for:**

2

3 **Dopamine signaling enriched striatal gene set predicts striatal**  
4 **dopamine synthesis and physiological activity in vivo**

5

6 **Authors:**

7 Leonardo Sportelli<sup>1,2,#</sup>, Daniel P. Eisenberg<sup>3,#</sup>, Roberta Passiatore<sup>2</sup>, Enrico D'Ambrosio<sup>2,4</sup>, Linda A.  
8 Antonucci<sup>2</sup>, Jasmine S. Bettina<sup>3</sup>, Qiang Chen<sup>1</sup>, Aaron L. Goldman<sup>1</sup>, Michael D. Gregory<sup>3</sup>, Kira  
9 Griffiths<sup>4,5</sup>, Thomas M. Hyde<sup>1,6,7</sup>, Joel E. Kleinman<sup>1,7</sup>, Antonio F. Pardiñas<sup>8</sup>, Madhur Parihar<sup>1</sup>, Teresa  
10 Popolizio<sup>9</sup>, Antonio Rampino<sup>2,10</sup>, Joo Heon Shin<sup>1</sup>, Mattia Veronese<sup>11,12</sup>, William S. Ulrich<sup>1</sup>, Caroline  
11 F. Zink<sup>13</sup>, Alessandro Bertolino<sup>2,10</sup>, Oliver D. Howes<sup>4</sup>, Karen F. Berman<sup>3</sup>, Daniel R. Weinberger  
12 <sup>1,6,7,14,15,\*</sup>, Giulio Pergola <sup>1,2,7,\*</sup>

13

14 **Affiliations:**

15 <sup>1</sup> Lieber Institute for Brain Development, Johns Hopkins Medical Campus, Baltimore, MD, USA.

16 <sup>2</sup> Group of Psychiatric Neuroscience, Department of Translational Biomedicine and Neuroscience,  
17 University of Bari Aldo Moro, Bari, Italy.

18 <sup>3</sup> Clinical and Translational Neuroscience Branch, National Institute of Mental Health, Intramural  
19 Research Program, NIH, DHHS, Bethesda, MD, USA.

20 <sup>4</sup> Department of Psychosis Studies, Institute of Psychiatry, Psychology and Neuroscience, King's  
21 College London, London, SE5 8AF, UK.

22 <sup>5</sup> Holmusk Technologies, New York, NY, USA.

23 <sup>6</sup> Department of Neurology, Johns Hopkins University School of Medicine, Baltimore, MD, USA.

24 <sup>7</sup> Department of Psychiatry and Behavioral Sciences, Johns Hopkins University School of Medicine,  
25 Baltimore, MD, USA.

26 <sup>8</sup> MRC Centre for Neuropsychiatric Genetics and Genomics, Cardiff University, Cardiff, UK.

27 <sup>9</sup> Radiology Department, IRCCS Ospedale Casa Sollievo della Sofferenza, Italy.

28 <sup>10</sup> Azienda Ospedaliero Universitaria Consorziale Policlinico, Bari, Italy.

29 <sup>11</sup> Department of Information Engineering, University of Padua, Italy.

30 <sup>12</sup> Department of Neuroimaging, Institute of Psychiatry, Psychology and Neuroscience, King's

31 College London, London, SE5 8AF, UK.

32 <sup>13</sup> Baltimore Research and Education Foundation, Baltimore, MD, USA.

33 <sup>14</sup> Department of Neuroscience, Johns Hopkins University School of Medicine, Baltimore, MD, USA.

34 <sup>15</sup> Department of Genetic Medicine, Johns Hopkins University School of Medicine, Baltimore, MD,  
35 USA.

36

37 # These authors contributed equally: Leonardo Sportelli, Daniel P. Eisenberg

38

39 \*Corresponding authors

40 Giulio Pergola, PhD

41 855 North Wolfe St

42 21205 Baltimore, MD

43 [Giulio.Pergola@libd.org](mailto:Giulio.Pergola@libd.org)

44 [Giulio.Pergola@uniba.it](mailto:Giulio.Pergola@uniba.it)

45

46 Please address correspondence to:

47 Daniel R. Weinberger, MD

48 855 North Wolfe St

49 21205 Baltimore, MD

50 [Daniel.Weinberger@libd.org](mailto:Daniel.Weinberger@libd.org)

51

52 **This File includes:**

53 Supplementary Methods, Supplementary Figures 1-8, Supplementary Table 1, Supplementary  
54 References.

55

## 56 *Supplementary Methods*

### 57 *Genotype data processing*

58 LIBD, NIH and UNIBA cohorts. Participants underwent blood withdrawal for subsequent  
59 DNA extraction from peripheral blood mononuclear cells. To this aim, approximately 20ml of fresh  
60 blood was obtained through a conventional venous blood collection with 10ml EDTA Vacutainer  
61 Venous Blood Collection Glass Tubes (Vacutainer ®). Approximately 200 ng DNA was used for  
62 genotyping analysis. DNA was concentrated at 50ng/µl (diluted in 10 mM Tris/1mM EDTA) with a  
63 Nanodrop Spectrophotometer (ND-1000). Samples were genotyped using variate Illumina Bead  
64 Chips including 510K/610K/660K/2.5M.

65 Quality control was performed on the cohorts separately using PLINK (version 2;  
66 <http://pngu.mgh.harvard.edu/purcell/plink/>)<sup>1</sup> according to standards developed by the Psychiatric  
67 Genomics Consortium<sup>2</sup> including SNP missingness < 0.05 (before sample removal); subject  
68 missingness < 0.02; autosomal heterozygosity deviation ( $|F_{het}| < 0.2$ ; for NIH cohort  $|F_{het}|$  within  
69 3.5 standard deviations); SNP missingness < 0.02 (after sample removal), SNP Hardy-Weinberg  
70 equilibrium (HWE:  $P > 10^{-6}$ ) and minor allele frequency (MAF) > 0.01. Furthermore, the degree of  
71 recent shared ancestry, i.e., the identity by descent (IBD)<sup>3</sup>, has been estimated within the cohorts  
72 to define the relatedness of all pairs on individuals through the PLINK function ‘--genome’<sup>4</sup>. The  
73 threshold 0.125 (for NIH cohort 0.185) represents the relatedness of 3rd degree<sup>5</sup> that was used as cut-  
74 off to exclude possible influence of relatedness within cohorts on dependency between observations<sup>6</sup>.  
75 Of each pair of related individuals, the one belonging to the group with greater numerosity within  
76 each cohort is dropped from the final datasets.

77 Genotype imputation was performed using the pre-phasing/imputation stepwise approach  
78 implemented in IMPUTE2 / SHAPEIT (default parameters and chunk size of 3 Mb for LIBD and  
79 UNIBA - 250 Kbp for NIH) and using Phase 3 1000 genome as reference panel<sup>7, 8</sup>. After imputation,  
80 imputed dosage data for each SNP with imputation quality (INFO) > 0.9 were used for polygenic risk  
81 scores (PRS) calculation.

82 For LIBD cohort, the first 10 principal components of the whole genome data were calculated  
83 using EIGENSOFT v5.01 (EIGENSOFT, <http://www.hsph.harvard.edu/alkes-price/software/>) and  
84 considered as nuisance covariates in genetic analysis while for UNIBA and NIH cohorts the  
85 *SNPRelate* R package<sup>9</sup> and PLINK (version 2) were respectively used..

86 KCL cohort. DNA was extracted from whole blood samples or cheek swabs using standard  
87 procedures<sup>10</sup>. Genotyping was performed at Cardiff University, using HumanCore Exome 1.1 arrays  
88 (“Psych-chip”, Illumina, San Diego, California, USA). Genotype quality control (QC) was performed  
89 according to standard parameters<sup>11</sup>.

90 PLINK (version 1.9) was used to implement pre-imputation quality control procedures.  
91 Individuals were excluded from the sample if estimates of the inbreeding coefficient  $F$  indicated  
92 ambiguous sex ( $F = 0.2 - 0.8$ ), or if there was a discrepancy between their genotypic and self-reported  
93 sex. Any discrepancies were checked with the data collection site to confirm no errors were made  
94 during manual entry of phenotypic data. Samples with a genotype call  $< 95\%$ , or high pairwise  
95 relatedness ( $\pi\text{-hat} > 0.1$ ) were excluded. SNPs were removed if  $\text{MAF} < 0.01$ , if deviation from HWE  
96 at  $p\text{-mid} \leq 1e\text{-}6$ , or if minimum marker call rate  $< 95\%$ .

97 Chromosome files were uploaded to the Michigan Imputation Server  
98 (<https://imputationserver.sph.umich.edu/index.html#!>) where they underwent in house quality control  
99 before being passed through imputation pipeline (see:  
100 <https://imputationserver.readthedocs.io/en/latest/>). Data passing QC were phased using Eagle<sup>12</sup> v2.4  
101 and imputed using minimac4 (<https://genome.sph.umich.edu/wiki/Minimac4>) with the HRC-r1.1  
102 reference panel<sup>13</sup> (GRCh37/hg19 array build), with population set to mixed. SNPs were excluded if  
103 the imputation INFO score was  $< 0.9$ ,  $\text{MAF} < 0.10$ , or  $\text{HWE } P < 1e\text{-}6$ ,  $\text{genome} = 0.05$ .

104 The Principal Components Analysis in Related samples (PC-AiR) method<sup>14</sup> was used in R  
105 (GENESIS R/Bioconductor package<sup>15</sup>) on the full set of genotypes to generate the top 10 principal  
106 components of the sample.

107

108 *SDA run and post-processing*

109 We run SDA 10 times using the following parameters:

110 -- N = 238 (number of samples)

111 -- max\_iter = 3000 (number of iterations)

112 -- num\_comps = 238 (number of components)

113 -- seed = 400 (used for results replication)

114 Running the method multiple times, we obtained some components that are found consistently  
115 across multiple runs, whereas other components only occur in a small number of them. To identify  
116 robust components, the authors of the paper implemented a method that clusters similar components  
117 across different runs. We then focused on large clusters containing components from multiple  
118 different runs and used these as the basis for further analyses. More specifically, at the end of each  
119 run we stored the individual and tissue scores, gene loadings and Posterior Inclusion Probabilities  
120 (PIPs = a ranking measure to assess whether the data favors the inclusion of a variable in the  
121 regression model, i.e., the probability that, after the SDA decomposition, each gene with his loading  
122 or weight belongs to a specific component). After the 10 runs finished, following what the authors  
123 did in the paper, we calculated the absolute correlation between the individual scores for all pairs of  
124 components across the ten runs. Hierarchical clustering was then used to group components into  
125 clusters, using one minus the absolute correlation as a dissimilarity measure. The clustering was  
126 terminated when no correlations between clusters were above 0.4. Although authors of SDA used 0.6  
127 as threshold, we decided to use a more lenient one to maximise the information considering our  
128 significantly smaller sample size. The components within each cluster were then combined. We took  
129 the mean of the individual scores, tissue scores and gene loadings and the median PIPs to obtain the  
130 most representative value within each cluster (centroid). We finally obtained 126 robust components  
131 and we used PIP threshold  $> .5$  to identify genes within each component.

132

133 *Parsed-PRS association with KCL PET data across different ancestry clusters*

134 Since the KCL discovery cohort was the most heterogeneous in terms of ethnicities included  
135 (Supplementary Table 1), together with the ancestry stratification reported in the main text for the  
136 main analyses, we also decided to evaluate different ancestry subdivisions based on the visualization  
137 of the first two PCA dimensions, i.e. top axes of variation. Following what we reported in the main  
138 text (see Methods), we used a procedure developed by the ENIGMA consortium that consists in  
139 performing a PCA on target data merged with the HapMap121 phase 3 reference dataset  
140 ([https://enigma.ini.usc.edu/wp-content/uploads/2012/07/ENIGMA2\\_1KGP\\_cookbook\\_v3.pdf](https://enigma.ini.usc.edu/wp-content/uploads/2012/07/ENIGMA2_1KGP_cookbook_v3.pdf)). For  
141 this analysis we included all KCL samples whose genotype information was available (N: 168). We  
142 then plotted the first two PCs against each other and defined two different clusters: one excluding  
143 individuals belonging to the African (AFR) and Euroasian (EA) ancestry group (PC1 cutoff = .048;  
144 PC2 cutoff = .013; N = 102; Supplementary Fig. 4a) and one including only individuals within the  
145 European (EUR) ancestry group (PC1 cutoff = 0; PC2 cutoff = -0.049; N = 88; Supplementary Fig.  
146 4a). Finally, after matching samples based on imaging data availability, for each of these clusters as  
147 well as for the whole KCL cohort, we evaluated the association of the C80 stratified PRS (C80-PRS)  
148 as well as its complementary score (C80-PRS-complementary) with [18F]-FDOPA uptake in the  
149 striatum indexed by Ki in the same identical fashion as the one reported in the main text (see Methods  
150 for details).

151 We found C80-PRS positively associated with greater striatal dopamine synthesis capacity as  
152 measured by [18F]-FDOPA specific uptake in NC and in patients with SCZ in the whole striatum and  
153 striatal subdivisions ROIs derived from Mawlawi, Martinez <sup>16</sup> and as described in McCutcheon, Beck  
154 <sup>17</sup> analysed in both ancestry clusters as well as the whole KCL cohort (Supplementary Fig. 4b).  
155 Interestingly, no significant association was found with complementary C80-PRS.

156

157 *Exploratory genetic risk association and biological characterization analyses of the other identified*  
158 *components*

159 We explored the association of the 69 identified components with SCZ PRS using the same  
160 multiple linear regression methods as reported in the main text (see Methods). We then looked at their  
161 biological characterization through enrichment and over-representation analyses to identify  
162 enrichment for SCZ risk genes as well as alternative pathways of risk convergence (see Methods for  
163 details). We found six additional components out of 69 associated with SCZ PRS at the nominal  
164 significance level (two-tailed  $\alpha=.05$ , uncorrected; Supplementary Fig. 6a). None showed significant  
165 effects of diagnosis in postmortem samples. Of these, only one component (C102) was also enriched  
166 for SCZ risk genes (empirical  $p <.05$ ; Supplementary Fig. 1a). C102 also showed enrichment for  
167 MDD, ASD, and PTSD risk genes as well as for SCZ differentially expressed genes (DEGs)  
168 previously observed in the CN, DLPFC, and HP (all empirical  $p <.05$ ; Supplementary Fig. 1a). The  
169 tissue loading matrix revealed the C102 component to be most active in the HP (Supplementary  
170 Figure 1a). Accordingly, cell specificity analysis showed enrichment for glutamatergic synapses of  
171 hippocampal CA pyramidal and dentate gyrus neurons, among others (Supplementary Fig. 6b).  
172 Consistently, KEGG pathway analysis for C102 showed enrichment for glutamatergic synapse as  
173 well as for nicotine and morphine addiction-related genes (Supplementary Fig. 6c). Finally, we  
174 computed PRSs stratified for genes within each SCZ-PRS-associated component and evaluated their  
175 association with striatal dopamine synthesis capacity as measured by [18F]-FDOPA specific uptake  
176 in our discovery NC and SCZ cohorts (see Methods). Notably, none of the six components were  
177 significantly associated with striatal dopamine synthesis (Supplementary Fig. 6d). Additionally, in  
178 order to disentangle the specificity of the effects of C80-PRS on brain activity, we investigated the  
179 association of the six stratified PRSs with BOLD signal on the fMRI discovery cohort as previously  
180 described (see Methods). We observed no significant association with either reward anticipation or  
181 reward consumption (results not shown), further supporting the specificity of the C80-PRS for  
182 reward-related brain activity.

183

184 *fMRI task layout*



185            LIBD cohort. The general layout of a trial in this version of the MID task is divided into three  
186 phases: cue (2000-3000 ms), target (up to 1250 ms in the ‘difficult condition’, while up to 1750 ms  
187 in the ‘easy’ condition), and outcome (450 ms). Immediately prior to scanning, participants were  
188 instructed on the task to be performed in the scanner, including being explicitly informed of the  
189 meaning of each cue. Cues indicated, via background color, whether the trial would be more likely  
190 difficult, more likely easy, i.e., how long the target would likely stay on the screen, and the reward  
191 magnitude, i.e., \$2 or \$0 (control trial). The target was the appearance of paper currency (or blank  
192 paper in the control condition) over a money safe. Participants were instructed to respond with a  
193 single button press with their right thumb when the target appeared, and if the target was hit, i.e.,  
194 response was made while the target was on the screen, the target (money bills or blank paper) fell  
195 into the money safe (450 ms). On the contrary, a trial was considered an error if the participant: a) did  
196 not respond to the target, b) pressed more than once to the target, or c) pressed prior to target  
197 appearance. In these cases, the target (money bills or blank paper) disappeared without falling into  
198 the money safe and participants did not receive money towards final payment. The outcome phase  
199 provided feedback for money earned from that trial. Intertrial intervals (2500-4500 s) were calculated  
200 to maintain the same number of trials regardless of reaction time variability. An extensive description  
201 of the task is provided by Kholi et al. 2018<sup>18</sup>.

202            UNIBA cohort. The general layout of a trial in this version of the MID task is divided into  
203 three phases: cue (2000 ms), target (up to 500 ms), and outcome (2000 ms). Immediately prior to  
204 scanning, participants were instructed on the task to be performed in the scanner, including being  
205 explicitly informed of the meaning of each cue. The target presentation duration was calculated based  
206 on individual performance during the training phase to achieve at least 67% success rate. Cue stimuli  
207 consisted of three different white geometric shapes: a full circle, representing a chance of gain 100  
208 points (reward condition), an empty circle, representing a chance of gain 0 point (control condition)  
209 and a full square, representing a chance of losing 100 points (punishment condition). The target was  
210 the appearance of a white triangle. Immediately after the response, feedback appeared for 2000 ms

211 documenting whether the participant had won or lost points as well as their cumulative total at that  
212 point. Participants were instructed to respond with a single button press with their right thumb when  
213 the target appeared to gain or to not lose points. A trial was considered a hit, when the response was  
214 made while the target was on the screen. On the contrary, a trial was considered an error if the  
215 participant: a) did not respond to the target, b) pressed prior to target appearance. The outcome phase  
216 provided feedback for money earned from that trial and the total amount earned so far.

217

### 218 *Striatal parcellation of C80-related fMRI activations*

219 To quantitatively assess the striatal subregions' overlap, we evaluated the distribution of the  
220 significant striatal clusters observed in the discovery and replication fMRI cohorts using canonical  
221 functional striatum ROI according to the parcellation described by Mawlawi, Martinez <sup>16</sup>, which  
222 defined three subregions—associative, limbic, and sensorimotor (Supplementary Fig, 7a)—that  
223 underlie distinct functions of the striatum based on the cortical afferents each of these subregions  
224 projects or receives. We calculated the percentage of clusters where we independently found a  
225 significant TFCE-FDR<.05 effect of the C80-PRS, overlapping with the three striatal subregions,  
226 excluding voxels outside the grey matter. Both clusters predominantly fell within the associative  
227 striatum (Discovery=95%; replication=99%) with a minimal percentage in the limbic striatum in the  
228 discovery cohort (5%) and sensorimotor striatum in the replication cohort (1%). These findings  
229 suggests that the effect is convincingly related to activity in the same striatal sub-region encompassing  
230 the caudate nucleus (Supplementary Fig. 7b).

231 Furthermore, to quantify the extent of voxelwise overlap between the two independently  
232 detected clusters from discovery and replication fMRI analyses, we counted the numbers of spatially  
233 overlapping voxels corresponding to 6 (162 mm<sup>3</sup>; Supplementary Fig. 7c). Notably, the overlap is  
234 located in the head of the CN, the same region used in the *postmortem* study. While the spatial  
235 correlation of fMRI signals may blur the accuracy of signal localization across different scanners and

236 experiments, the rest of these two overlapping clusters is still contained in the associative striatum as  
237 defined by Mawlawi, Martinez <sup>16</sup>.

238

### 239 *ROIs analysis on individual striatal fMRI activations*

240 To account for the potential influence of individual variability in the localization of the C80-  
241 PRS effects on BOLD signal, we complemented the voxelwise analysis by extracting the individual  
242 signal from striatum ROIs using an uncorrected threshold of  $\alpha < .005$ <sup>19</sup>. We employed the six striatum  
243 ROIs (right and left associative, sensorimotor, and limbic subregions per Mawlawi, Martinez <sup>16</sup> and  
244 as described above). Subsequently, we performed associations of the C80-PRS with the signal  
245 extracted from the individual activation maps from the left and the right ROIs. Given that the  
246 uncorrected signal derived from the ROIs may be susceptible to type-I errors, post-hoc associations  
247 were adjusted for multiple comparisons to account for the number of tests conducted ( $k=6$ ). Extracting  
248 the averaged signal from the associative striatum ROIs, we confirmed the significant positive  
249 associations on the signal extracted from the right associative striatum ROI (discovery:  $t(84)=3.34$ ;  
250  $p_{[FDR]}=.006$ ; partial  $R^2=0.12$ ; replication:  $t(53)=3.45$ ;  $p_{[FDR]}=.005$ ; partial  $R^2=0.18$ ) along with  
251 significant positive associations on the signal extracted from the left associative striatum ROI, though  
252 with smaller effect sizes (discovery:  $t(84)=2.39$ ;  $p_{[FDR]}=.05$ ; partial  $R^2=0.06$ ; replication:  $t(53)=3.28$ ;  
253  $p_{[FDR]}=0.009$ ; partial  $R^2=0.16$ ; Supplementary Fig. 8). No associations were significant in the limbic  
254 and sensorimotor striatum ( $p_{[FDR]}>.05$ ) in either sample. Nevertheless, the potential influence of  
255 individual variability in signal localization, coupled with the limited sample sizes could have  
256 prevented the identification of under-threshold BOLD effects at the voxel-wise level on the left  
257 hemisphere.

258

259

260 *Supplementary Figures*

261

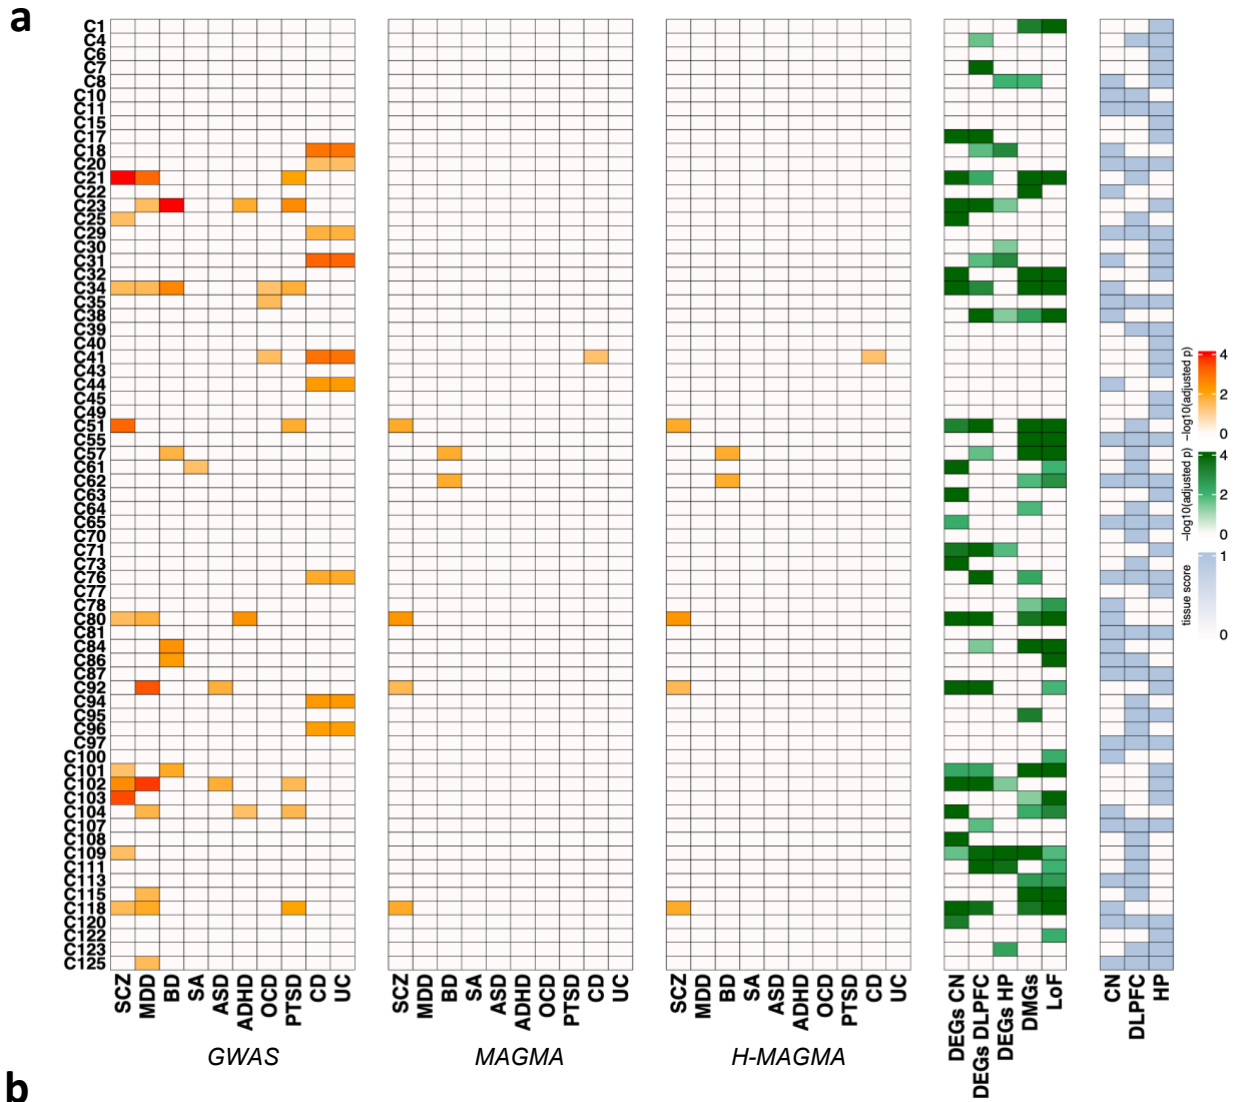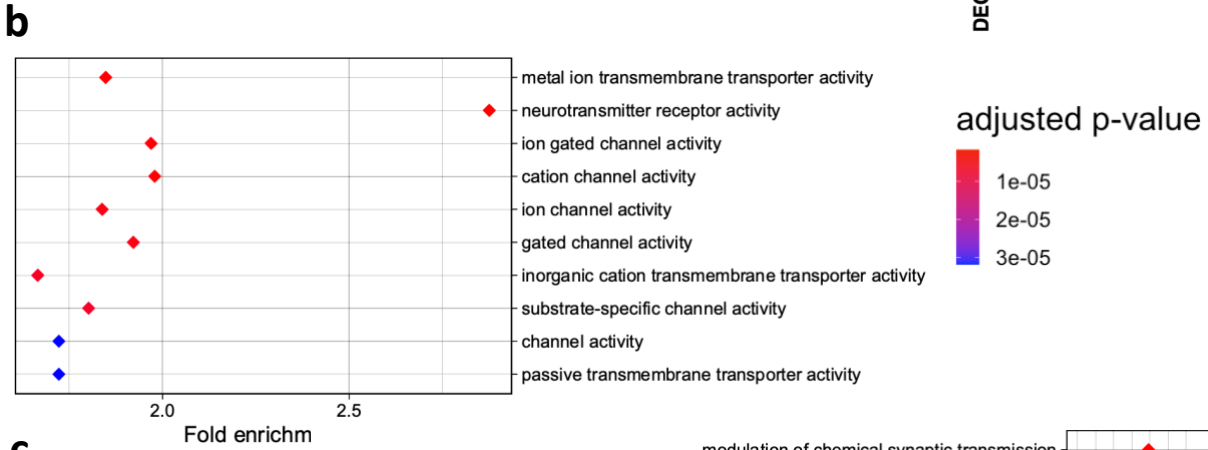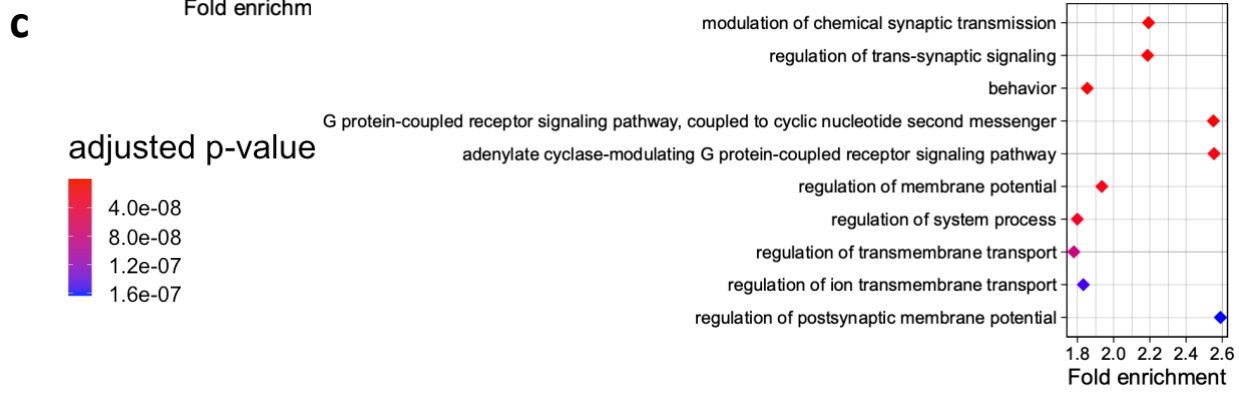

263 **Supplementary Figure 1: 69 SDA components characterization analyses results and discovery**  
264 **C80 enriched gene ontologies.**

265 **a**, Gene enrichment analysis results are shown for all 69 robust components. From the left, the first  
266 (GWAS), second (MAGMA) and third orange grids (H-MAGMA) show enrichment results for  
267 schizophrenia risk genes, other psychiatric illness risk genes, and immune condition risk genes.  
268 Enrichment testing results are shown for differentially expressed genes, differentially methylated  
269 genes, and loss of function variant intolerant genes in the green grid. The final lightblue grid show  
270 tissue specificity as determined by the tissue scores generated during the SDA process and reflects  
271 the relative contribution of component gene networks within each of the sampled regions to the  
272 overall component. Adjusted p-values shown are empirical p-values obtained from permutation tests  
273 (overrepresentation analysis: one-sided Fisher exact test).

274 See Fig. 2 caption for abbreviations.

275 **b**, and **c**, Gene ontology enrichment of C80 for biological processes and molecular function.  
276 Overrepresentation analysis was performed using the *clusterProfiler R*<sup>20</sup> package and FDR-adjusted  
277 p-values are reported. Diamonds represent fold enrichment (x-axis) for each Gene ontology category  
278 (y-axis) and are colored based on the respective adjusted p-value.

279

280

281

282

283

284

285

286

287

288

289

290

291

292

293

294

295

296

297

298

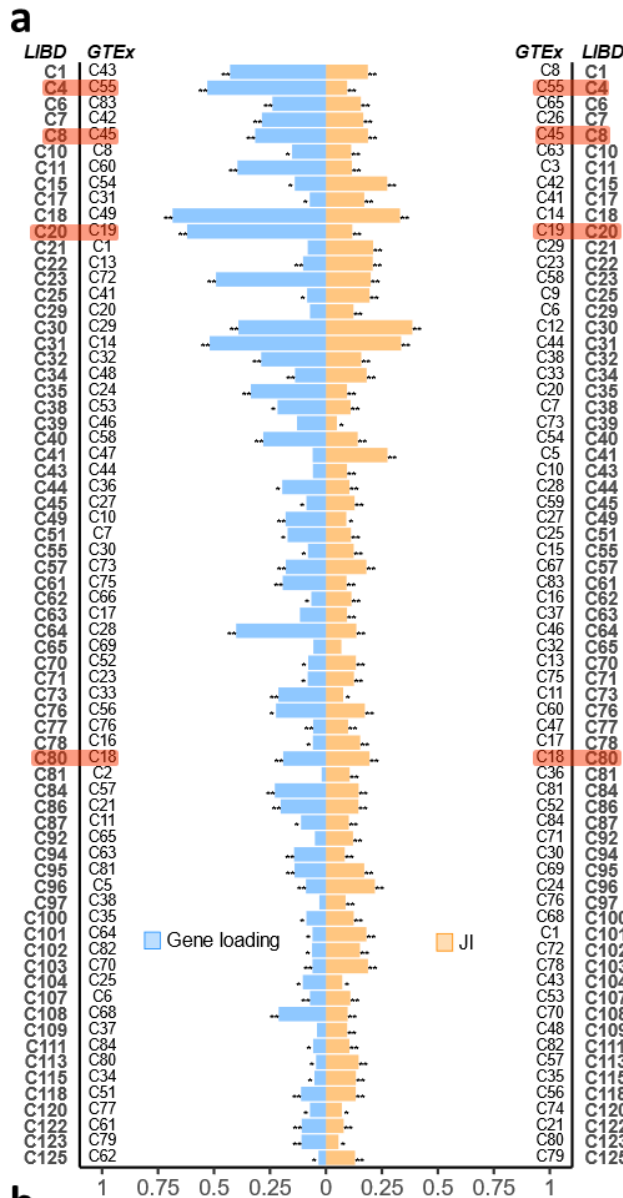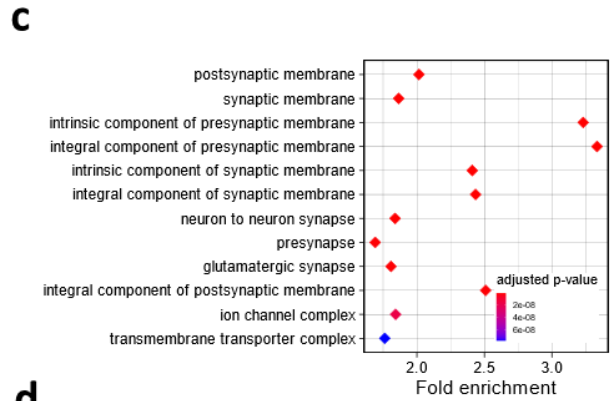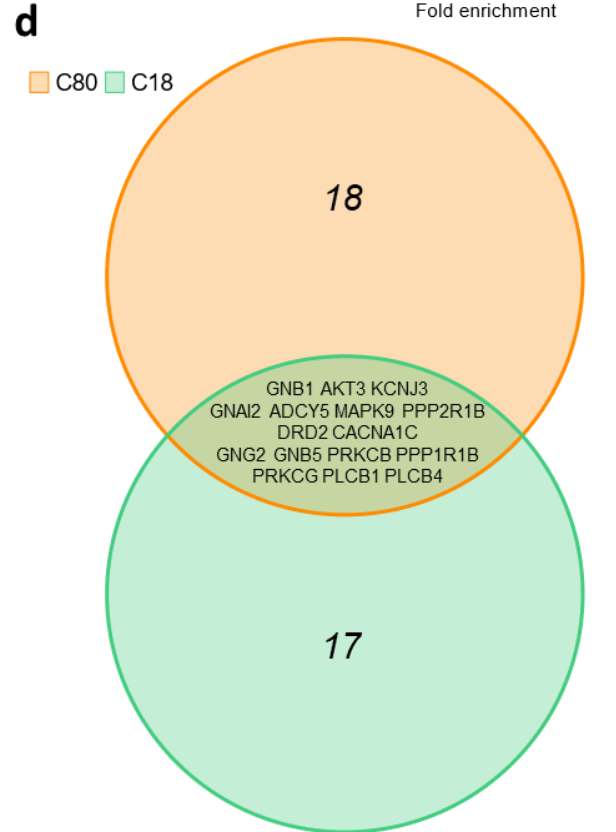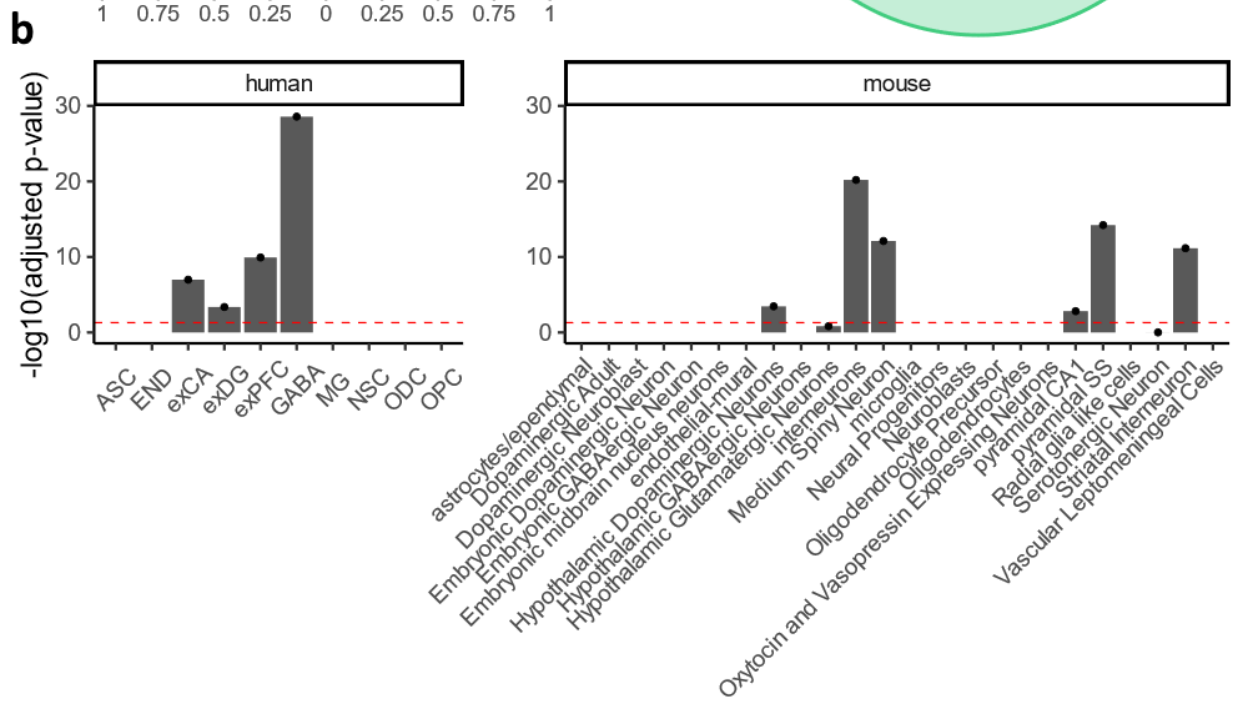

300 **Supplementary Figure 2: GTEx replication analyses results.**

301 **a**, 69 SDA components generated from the LIBD discovery dataset replicated in the GTEx dataset  
302 using JI (orange bars) or gene loading correlation (light blue bars). (\*) indicates statistical significance  
303 after one-sided permutations test  $< .05$ ; (\*\*) indicates statistical significance after one-sided  
304 permutations test  $< .001$ . JI values on the right and gene loading  $R^2$  on the left x axis are shown.  
305 Discovery C80 and replication C18 are one of the 4 pairs of components highlighted in red that are  
306 consistent with both replication measures. Source data are provided as a Source Data file.

307 **b**, Cell-type specificity of replication component C18 using human (left) and mouse (right) single-  
308 cell atlases. Mean-rank Gene Set Test in the *limma R* package<sup>21</sup> was used to obtain enrichment p-  
309 values shown. y-axes show FDR-adjusted p-values after correcting for multiple comparisons across  
310 components ( $N = 69$ ) and cell types (human atlas = 10; mouse atlas = 24). Red dashed lines represent  
311  $\alpha_{[FDR]}=.05$ . Individual data points are shown using overlaid dot plots. Barplots demonstrates a higher  
312 specificity for GABAergic, medium spiny and dopaminergic neurons. See Figure 2 caption for  
313 abbreviations. Source data are provided as a Source Data file.

314 **c**, Gene ontology enrichment of replication component C18 for cellular compartments.  
315 Overrepresentation analysis was performed using the *clusterProfiler R*<sup>20</sup> package and FDR-adjusted  
316 p-values are reported. Diamonds represent fold enrichment (x-axis) for each Gene ontology category  
317 (y-axis) and are colored based on the respective adjusted p-value.

318 **d**, Venn diagram showing intersection between C80 (orange) and C18 (green) genes enriched for  
319 KEGG term dopaminergic synapse with  $p_{[FDR]}<.05$ .

320

321

322

323

324

325

326

327

328

329

330

331

332

333

334

335

336



**a**

### WHOLE STRIATUM ~ PRS2

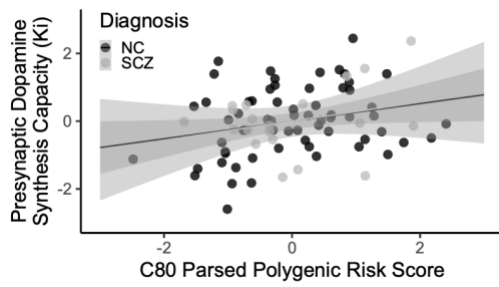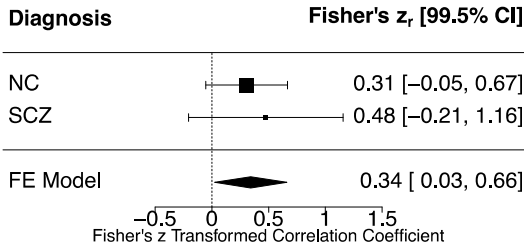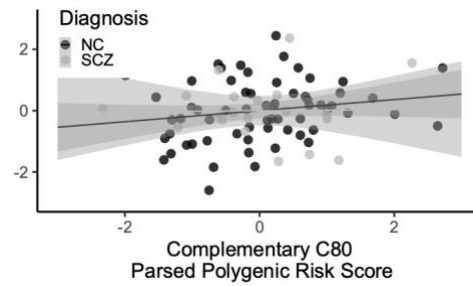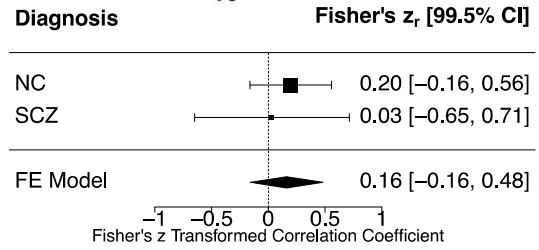

**b**

### ASSOCIATIVE STRIATUM ~ PRS1

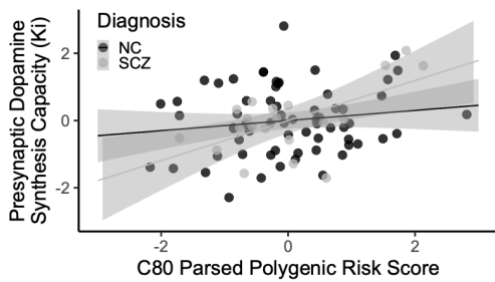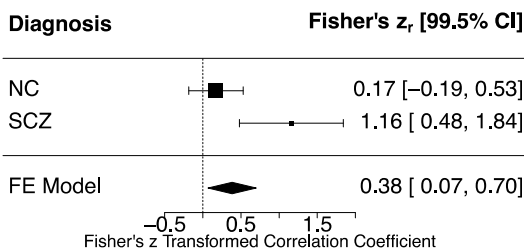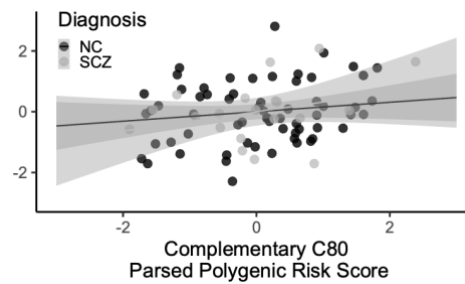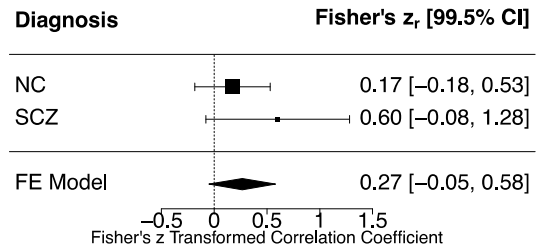

**c**

### ASSOCIATIVE STRIATUM ~ PRS2

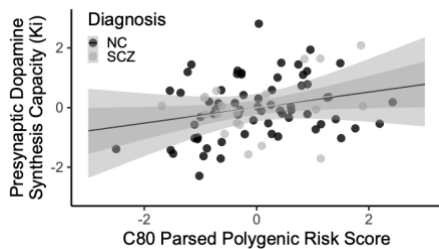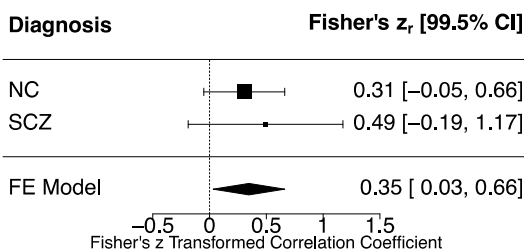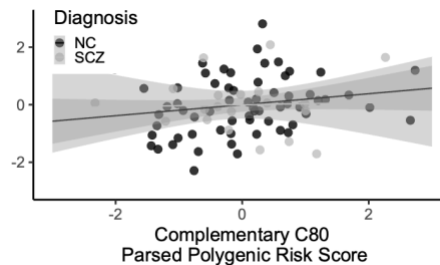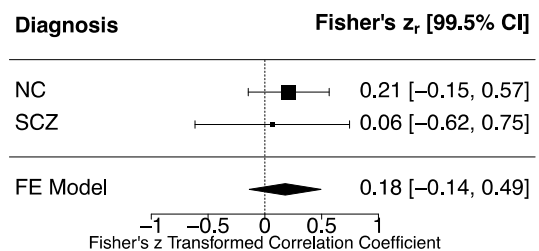

338 **Supplementary Figure 3: C80 and complementary C80-PRS association with dopamine**  
339 **synthesis capacity in different striatal subdivisions.**

340 **a**, Association between C80-PRS and complementary C80-PRS with whole-striatum dopamine  
341 synthesis capacity in the PET discovery cohort ( $n = 84$  individuals; 64 NC and 20 SCZ). Scatter plots  
342 on the top show standardized individual mean  $K_i$  values for whole-striatum region of interest (ROI)  
343 plotted against C80-PRS2 (left) and complementary C80-PRS2 (right) for the neurotypical control  
344 and SCZ subjects. The forest plots of the respective metaanalyses are shown on the right and left  
345 bottom. Mean fitted values and related shaded 95% confidence interval are shown in the scatterplots.  
346 Fisher's  $r$ -to- $z$  transformed correlation coefficients and related 99.5% confidence interval are shown  
347 in the forest plot. Source data are provided as a Source Data file.

348 **b**, and **c**, Association between C80-PRS and complementary C80-PRS with associative-striatum  
349 dopamine synthesis capacity in the PET discovery cohort ( $n = 84$  individuals; 64 NC and 20 SCZ).  
350 Scatter plots on the top show standardized individual mean  $K_i$  values for associative-striatum ROI  
351 plotted against C80-PRS1 and complementary C80-PRS1 (**b** left and right respectively) as well as  
352 C80-PRS2 and complementary C80-PRS2 (**c** left and right respectively) for the neurotypical control  
353 and SCZ subjects. The forest plots of the respective metaanalyses are shown on the right and left  
354 bottom. Mean fitted values and related shaded 95% confidence interval are shown in the scatterplots.  
355 Fisher's  $r$ -to- $z$  transformed correlation coefficients and related 99.5% confidence interval are shown  
356 in the forest plot. Source data are provided as a Source Data file.

357

358

359

360

361

362

363

364

365

366

367

368

369

370

371

372

373

374

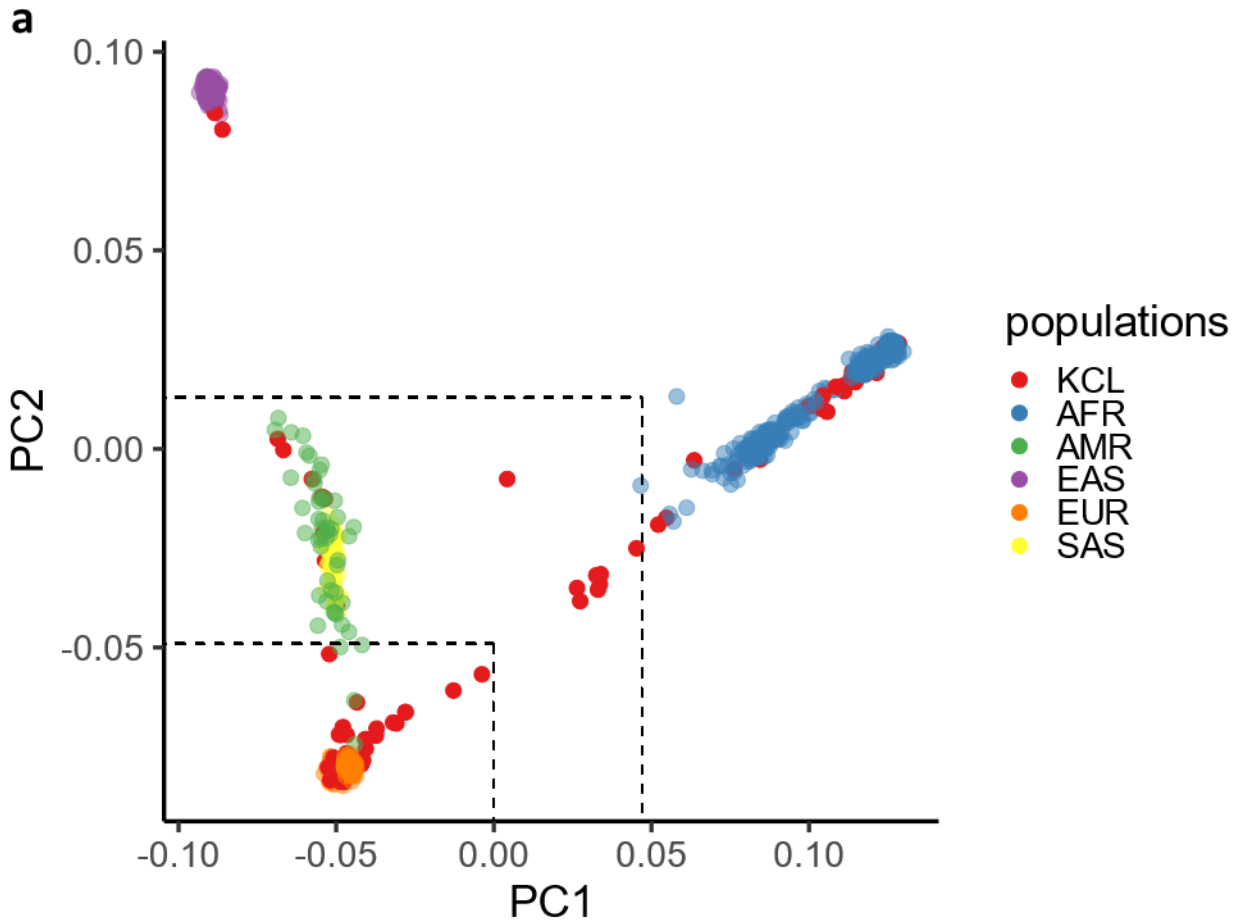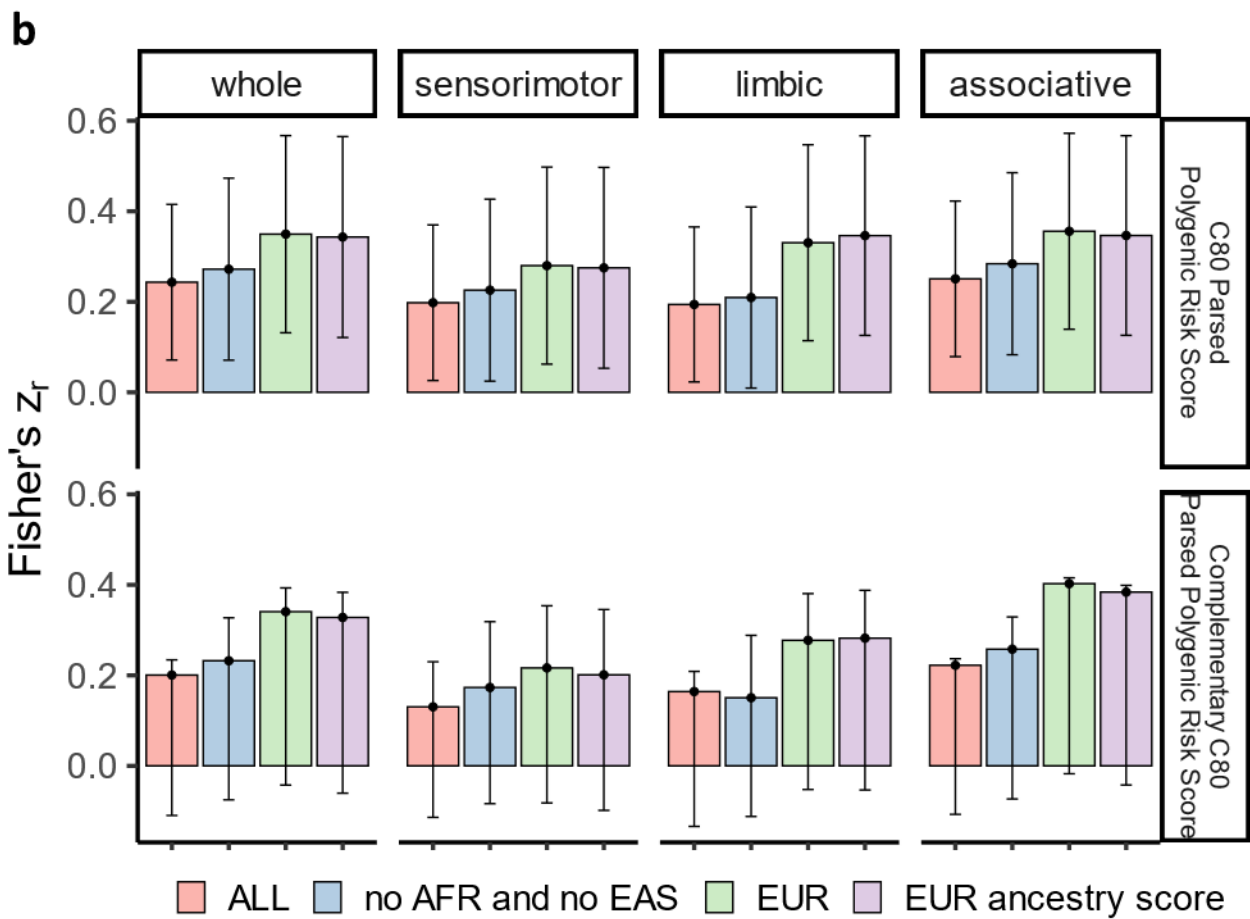

376 **Supplementary Figure 4: C80-PRS and complementary C80-PRS association with striatal**  
377 **dopamine synthesis capacity across different ancestry definitions.**

378 **a**, Population stratification plot for discovery KCL cohort. The graph shows the overlap of the first  
379 two principal components based on genetic markers from KCL sample and a reference dataset  
380 (HapMap3; 5 super populations used). Red dots represent individuals in the KCL cohort. Black  
381 dashed lines delineate PC1 and PC2 cutoffs used to define the different ancestry clusters. Source data  
382 are provided as a Source Data file.

383 **b**, Associations between C80-PRS2 and complementary C80-PRS2 in multiple striatum subdivisions  
384 and across different ancestry clusters in the discovery KCL cohort are shown. Bar plots indicate meta-  
385 analytic Fisher's r-to-z transformed correlation coefficients obtained from respective meta-analyses  
386 performed for each striatal subdivision and each ancestry group. Error bars related to 95% confidence  
387 interval are also plotted. *ALL* indicates whole KCL cohort used; *no AFR and no EAS* indicates KCL  
388 samples excluding those overlapping with reference AFR and EAS ancestry; *EUR* indicates only  
389 KCL samples overlapping with reference EUR ancestry; *EUR ancestry score* indicates KCL samples  
390 included after ancestry score computation (see Methods for details). Source data are provided as a  
391 Source Data file.

392

393 *Abbreviations: AFR: African; AMR: Ad Mixed American; EAS: East Asian; EUR: European; SAS:*  
394 *South Asian*

395

396

397

398

399

400

401

402

403

404

405

406

407

408

409

410

**a**

## [<sup>18</sup>F]-FDOPA PET

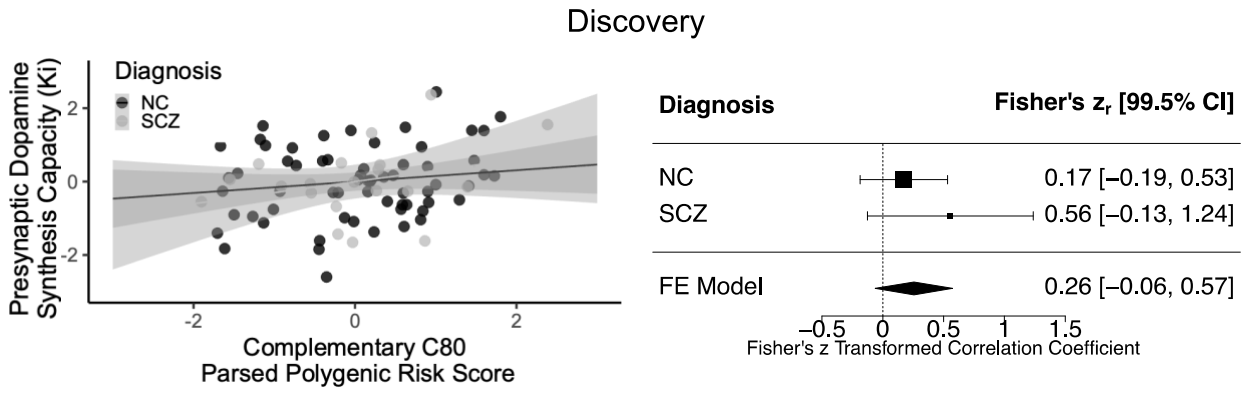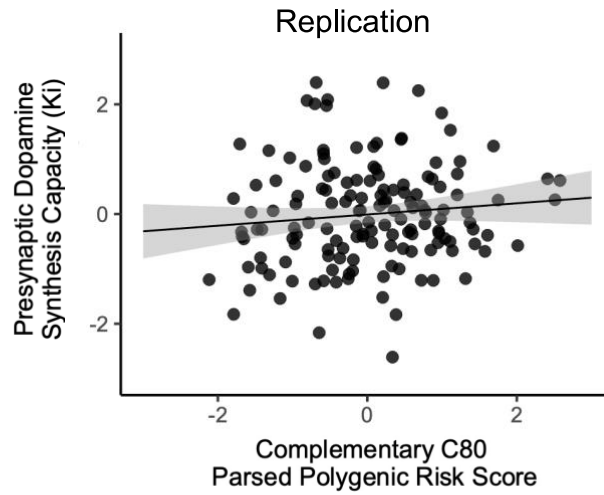

**b**

## fMRI BOLD

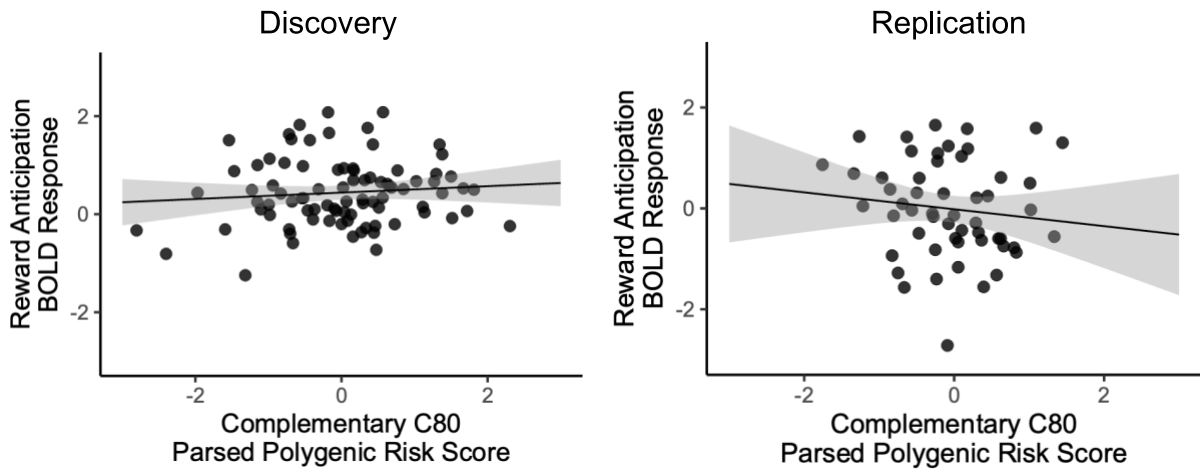

412 **Supplementary Figure 5: Complementary C80-PRS association with neuroimaging**  
413 **parameters: striatal dopamine synthesis capacity ([18F]-FDOPA PET) and reward**  
414 **anticipation-related fMRI activation (fMRI BOLD).**

415 **a**, Associations between complementary C80-PRS and both PET cohorts are shown. First row (PET  
416 discovery;  $n = 84$  individuals; 64 NC and 20 SCZ): scatter plot on the left shows individual mean  $K_i$   
417 values for the whole-striatum region of interest (ROI) plotted against complementary C80-PRS for  
418 the neurotypical control and SCZ subjects while on the right the relative forest plot of the metanalysis  
419 is shown.

420 Second row (PET replication;  $n = 150$  individuals): scatter plot shows individual mean  $K_i$  values for  
421 the whole-striatum ROI plotted against complementary C80-PRS.

422 Mean fitted values and related shaded 95% confidence interval are shown in the scatterplots. Fisher's  
423  $r$ -to- $z$  transformed correlation coefficients and related 99.5% confidence interval are shown in the  
424 forest plot. Source data are provided as a Source Data file. Source data are provided as a Source Data  
425 file.

426 **b**, Associations between complementary C80-PRS and both fMRI cohorts are shown. Scatter plots  
427 show standardized individual MID-related fMRI BOLD contrasts (discovery on the left:  $n = 86$   
428 neurotypical individuals; replication on the right:  $n = 55$  neurotypical individuals) plotted against  
429 complementary C80-PRS. Mean fitted values and related shaded 95% confidence interval are shown  
430 in the scatterplots. Source data are provided as a Source Data file.

431

432

433

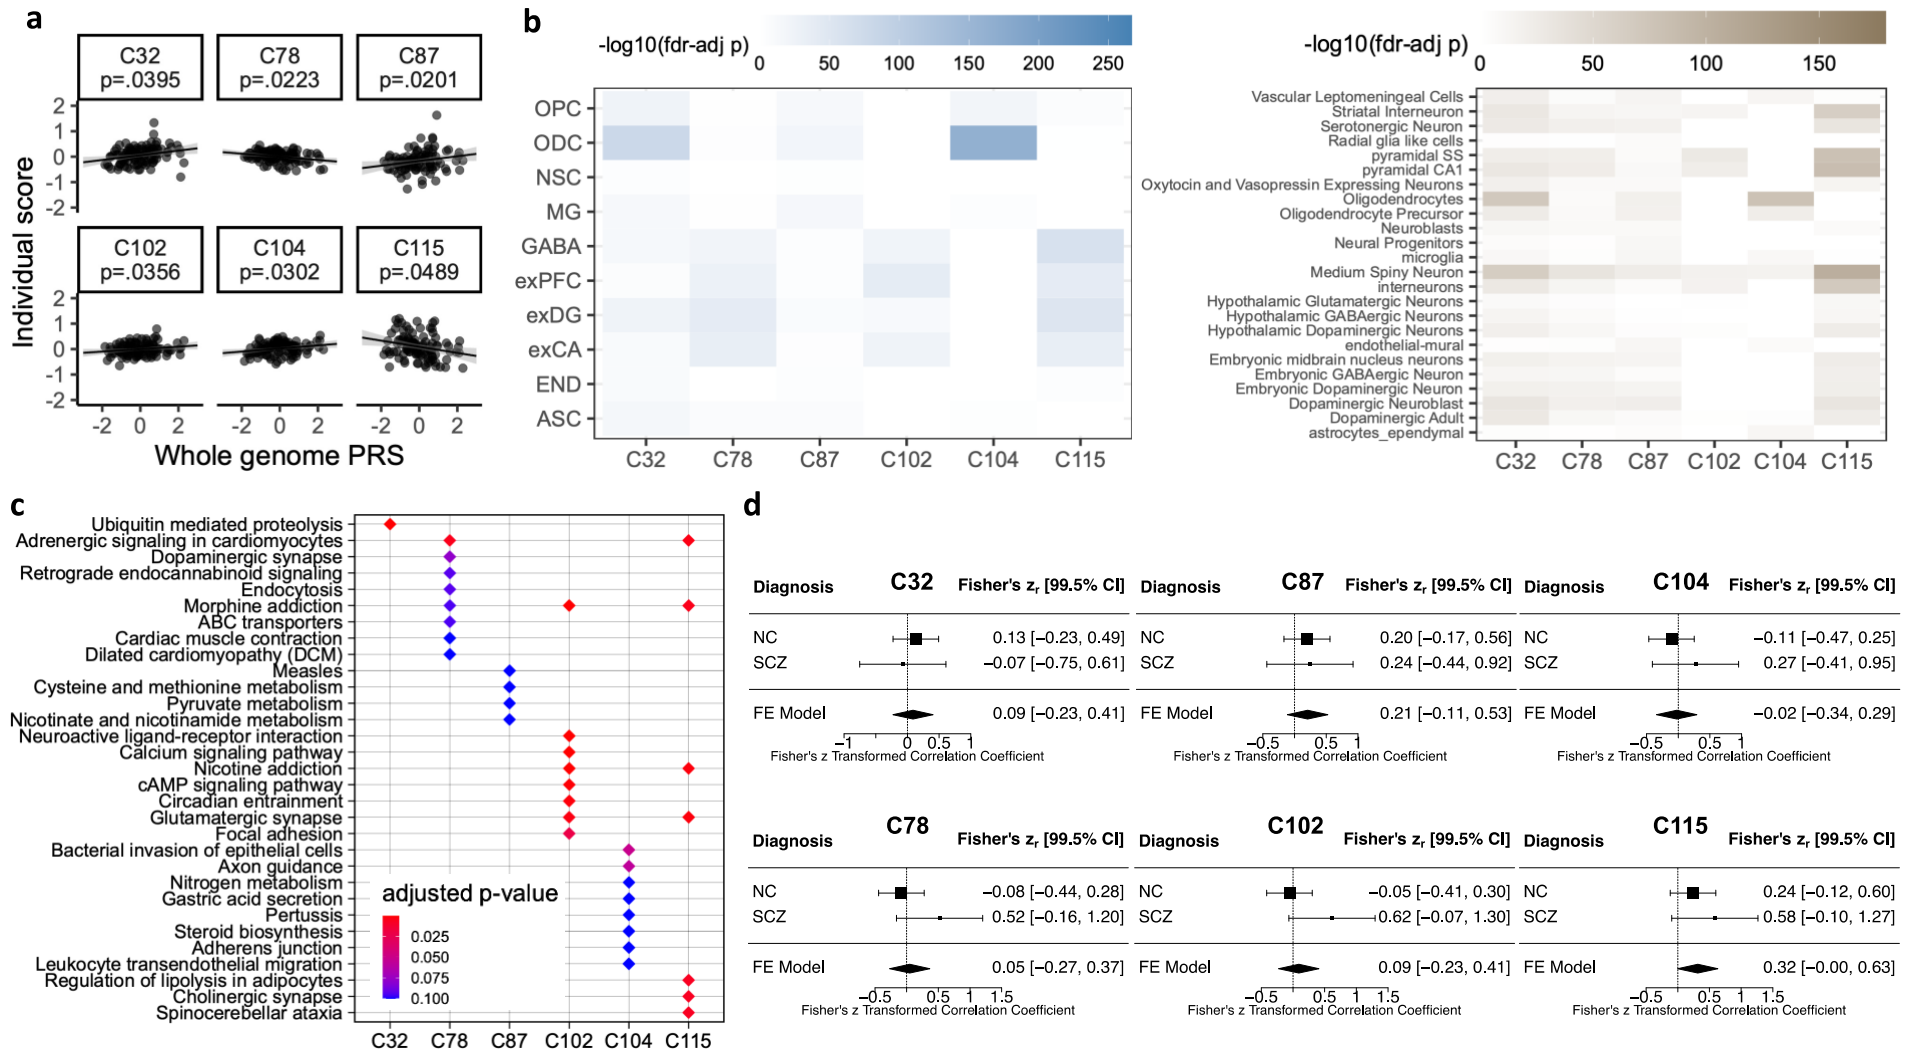

434

435 **Supplementary Figure 6: Biological characterization, genetic risk, and striatal dopamine synthesis capacity association of other SDA**  
 436 **components.**

437 **a**, Scatter plots show SDA component scores (y-axis) as a function of polygenic risk for schizophrenia (x-axis) and include regression fit line with  
438 mean fitted values and related shaded 95% confidence interval. Nominal two-tailed p-values are shown. Source data are provided as a Source Data  
439 file.

440 **b**, Heatmaps show cell-type marker genes overrepresentation using human (light-blue) and mouse (brown) single-cell atlases. Mean-rank Gene Set  
441 Test in the *limma R* package<sup>21</sup> was used to obtain enrichment p-values shown. FDR-adjusted p-values after correcting for multiple comparisons across  
442 components (N = 69) and cell types (human atlas = 10; mouse atlas = 24) are shown. See Figure 2 caption for abbreviations.

443 **c**, KEGG enrichment of all six PRS-associated components. Overrepresentation analysis was performed using the *clusterProfiler R*<sup>20</sup> package and  
444 FDR-adjusted p-values are reported. Diamonds represent each KEGG category (y-axis) enriched for each component (x-axis) and are colored based  
445 on the respective adjusted p-value. **d**, Forest plots show meta-analyses of the association between the six stratified PRSs with whole-striatum dopamine  
446 synthesis capacity in the PET discovery cohort. Fisher's r-to-z transformed correlation coefficients and related 99.5% confidence intervals are shown.  
447 Source data are provided as a Source Data file.

448

449



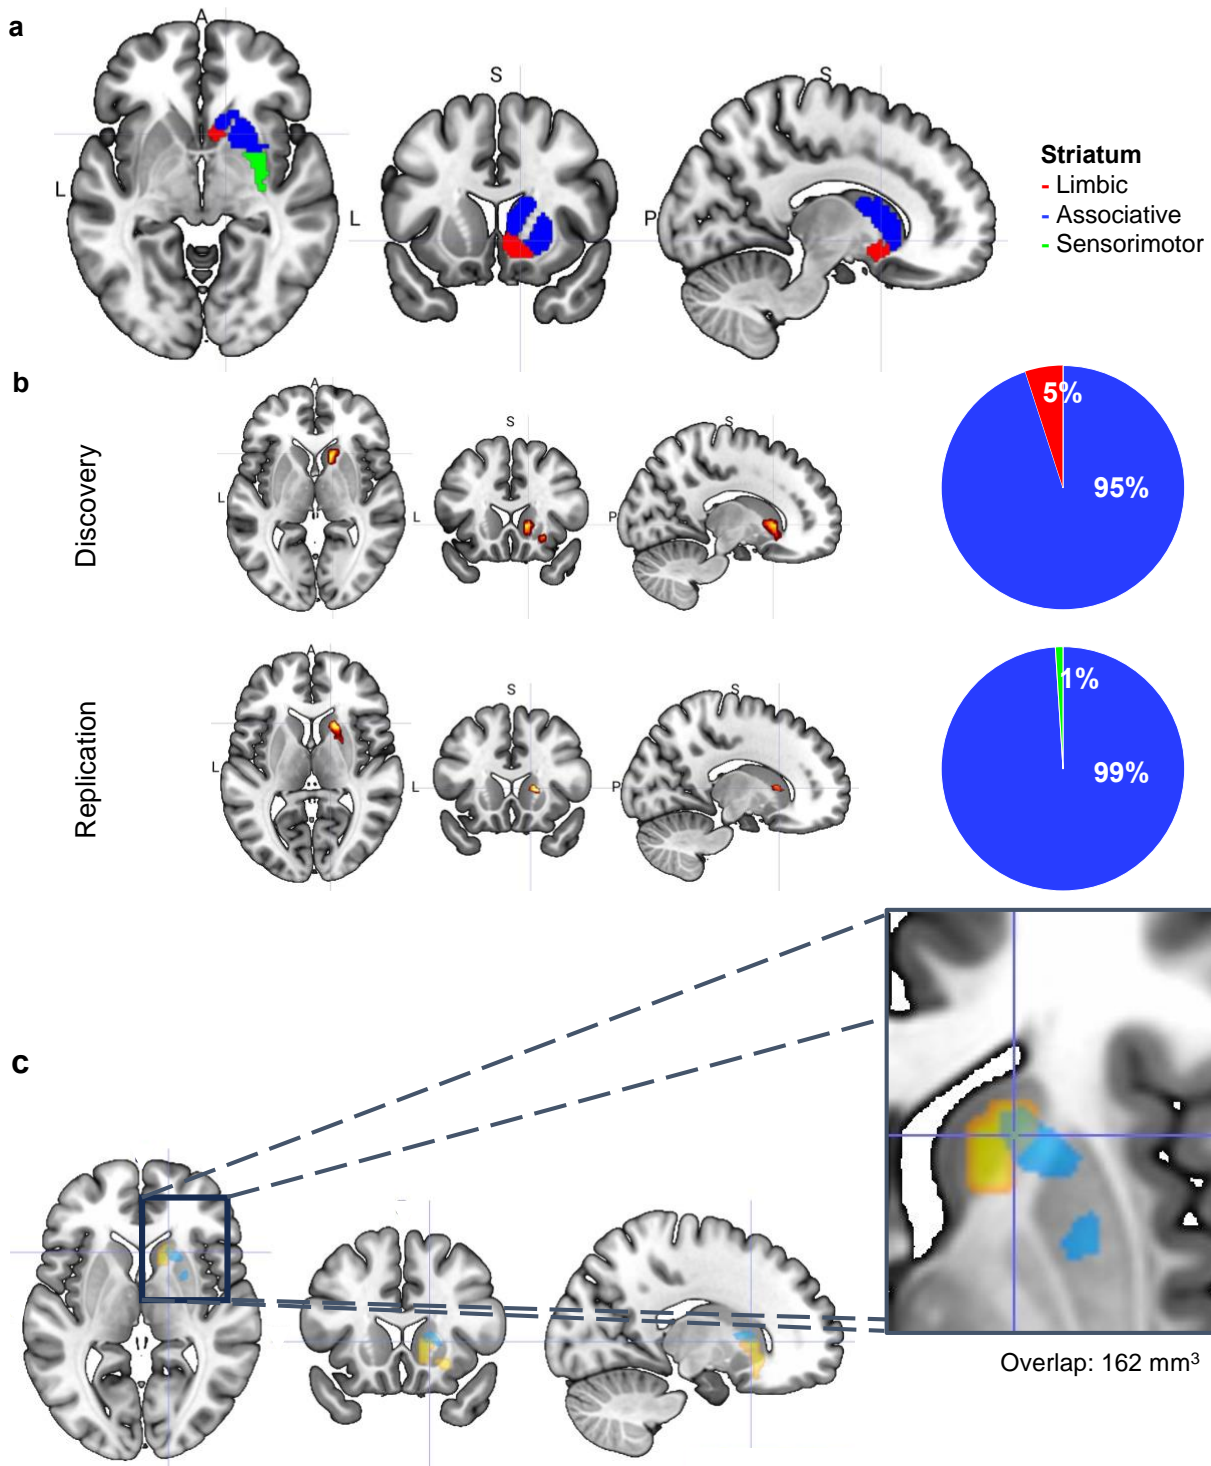

450

451 **Supplementary Figure 7. Striatal parcellation of C80-PRS related BOLD activations during**  
 452 **reward anticipation.**

453 **a**, sections showing the localization of the right striatum ROIs divided in associative, limbic, and  
 454 sensorimotor sub-regions depicted in blue, red, and green respectively.

455 **b**, Pie charts depicting the percentage of fMRI voxels associated with the C80 Parsed Polygenic Risk  
 456 Score at the voxel-wise level in the discovery and replication samples (TFCE-FDR<.05) within each  
 457 of the striatal sub-divisions.

458 **c**, Zooming section showing the overlap extension of the clusters significantly associated with the  
 459 C80 Parsed Polygenic Risk Score at the voxel-wise level in the discovery (yellow) and replication  
 460 (blue) samples (TFCE-FDR<.05) covering 6 voxels (162 mm<sup>3</sup>) within the right associative striatum  
 461 ROI.  
 462

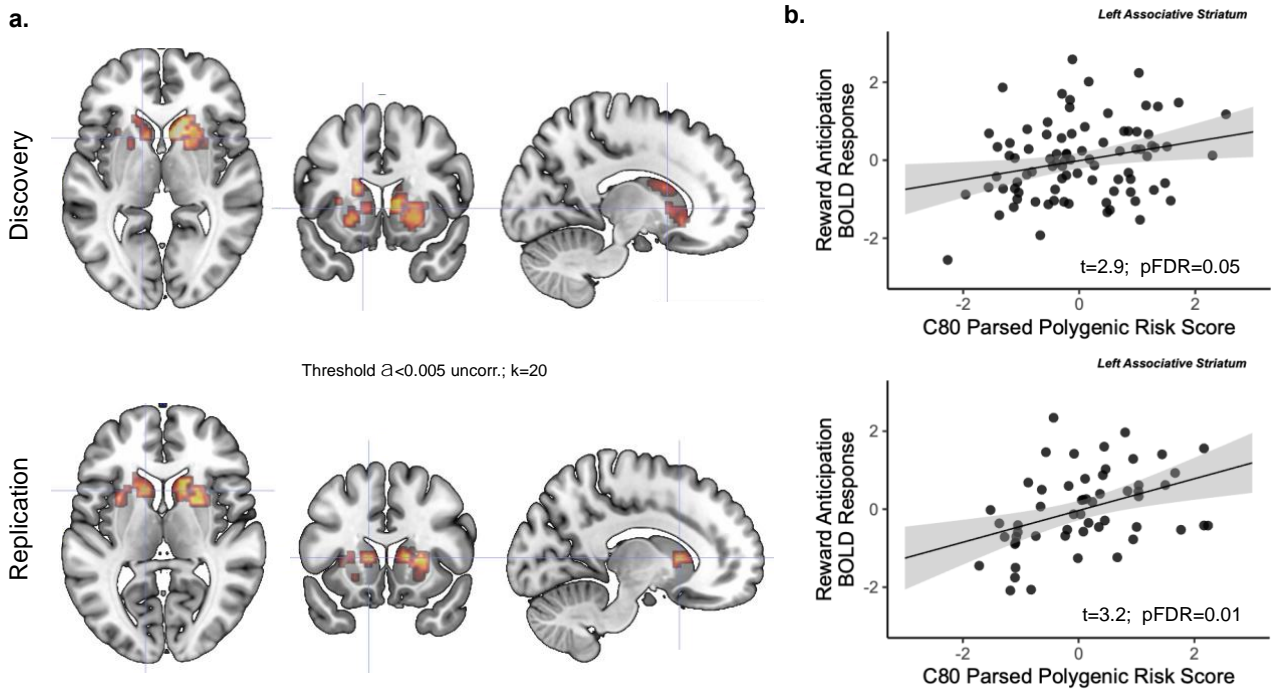

463  
 464  
 465

**Supplementary Figure 8. ROIs analysis on individual striatal fMRI activations.**

466 **a**, Sections showing the activation patterns at the group level within the bilateral striatum ROIs<sup>16,17</sup>  
 467 at  $\alpha < .005$ ,  $k=20$  in the discovery (top;  $n = 86$  neurotypical individuals) and replication (bottom;  $n =$   
 468  $55$  neurotypical individuals) samples.  
 469 **b**, Scatterplot showing the associations between the signal extracted from the individual activation  
 470 maps from the left associative striatum ROI and the C80-PRS in the discovery (top;  $n = 86$   
 471 neurotypical individuals) and replication (bottom;  $n = 55$  neurotypical individuals) samples. Mean  
 472 fitted values and related shaded 95% confidence interval are shown in the scatterplots. Source data  
 473 are provided as a Source Data file.  
 474

475 *Supplementary Tables*

476

477 **Supplementary Table 1.**

478 Demographics of cohorts used for neuroimaging association and ancestry stratification analyses are  
 479 tabulated. Table is separated for samples whose imaging or genetic data is available.

480 *Abbreviations: NC: Neurotypical controls; SCZ: Patients with schizophrenia; EUR: European*

481

| Modality                          | Cohort             | Diagnosis (NC/SCZ) | N     | Self-declared Ancestry                                                     |
|-----------------------------------|--------------------|--------------------|-------|----------------------------------------------------------------------------|
| <b>Imaging</b>                    |                    |                    |       |                                                                            |
| <b>[<sup>18</sup>F]-FDOPA PET</b> | <b>Discovery</b>   | NC                 | 92    | White British = 64<br>Black British = 19<br>Asian British = 4<br>Mixed = 5 |
|                                   |                    | SCZ                | 47    | /                                                                          |
|                                   | <b>Replication</b> | NC                 | 150   | EUR: 150                                                                   |
| <b>Reward fMRI</b>                | <b>Discovery</b>   | NC                 | 86    | EUR: 86                                                                    |
|                                   | <b>Replication</b> | NC                 | 55    | EUR: 55                                                                    |
| <b>Genetic</b>                    |                    |                    |       |                                                                            |
| <b>[<sup>18</sup>F]-FDOPA PET</b> | <b>Discovery</b>   | NC                 | 121   |                                                                            |
|                                   |                    | SCZ                | 47    |                                                                            |
|                                   | <b>Replication</b> | NC                 | 169   |                                                                            |
| <b>Reward fMRI</b>                | <b>Discovery</b>   | NC                 | 86    |                                                                            |
|                                   | <b>Replication</b> | NC<br>SCZ          | 2,178 |                                                                            |

482

483

484

485

486 *Supplementary References*

- 487 1. Purcell S, *et al.* PLINK: a tool set for whole-genome association and population-based linkage  
488 analyses. *Am J Hum Genet* **81**, 559-575 (2007).
- 489  
490 2. Schizophrenia Working Group of the Psychiatric Genomics Consortium, Ripke S, Walters JT,  
491 O'Donovan MC. Mapping genomic loci prioritises genes and implicates synaptic biology in  
492 schizophrenia. *medRxiv*, (2020).
- 493  
494 3. Lange K. *Mathematical and statistical methods for genetic analysis*. Springer (1997).
- 495  
496 4. Ellingson SR, Fardo DW. Automated quality control for genome wide association studies. *F1000Res*  
497 **5**, 1889 (2016).
- 498  
499 5. Wright S. Coefficients of Inbreeding and Relationship. *The American Naturalist* **56**, 330-338 (1922).
- 500  
501 6. Gross A, Tönjes A, Scholz M. On the impact of relatedness on SNP association analysis. *BMC Genet*  
502 **18**, 104 (2017).
- 503  
504 7. Howie B, Marchini J, Stephens M. Genotype imputation with thousands of genomes. *G3 (Bethesda)*  
505 **1**, 457-470 (2011).
- 506  
507 8. Delaneau O, Marchini J, Zagury JF. A linear complexity phasing method for thousands of genomes.  
508 *Nat Methods* **9**, 179-181 (2011).
- 509  
510 9. Zheng X, Levine D, Shen J, Gogarten SM, Laurie C, Weir BS. A high-performance computing toolset  
511 for relatedness and principal component analysis of SNP data. *Bioinformatics* **28**, 3326-3328 (2012).
- 512  
513 10. Freeman B, Smith N, Curtis C, Hockett L, Mill J, Craig IW. DNA from buccal swabs recruited by mail:  
514 evaluation of storage effects on long-term stability and suitability for multiplex polymerase chain  
515 reaction genotyping. *Behav Genet* **33**, 67-72 (2003).
- 516  
517 11. Anderson CA, Pettersson FH, Clarke GM, Cardon LR, Morris AP, Zondervan KT. Data quality control in  
518 genetic case-control association studies. *Nat Protoc* **5**, 1564-1573 (2010).
- 519  
520 12. Loh PR, *et al.* Reference-based phasing using the Haplotype Reference Consortium panel. *Nat Genet*  
521 **48**, 1443-1448 (2016).
- 522  
523 13. McCarthy S, *et al.* A reference panel of 64,976 haplotypes for genotype imputation. *Nat Genet* **48**,  
524 1279-1283 (2016).
- 525  
526 14. Conomos MP, Miller MB, Thornton TA. Robust inference of population structure for ancestry  
527 prediction and correction of stratification in the presence of relatedness. *Genet Epidemiol* **39**, 276-  
528 293 (2015).

- 529  
530 15. Gogarten SM, *et al.* Genetic association testing using the GENESIS R/Bioconductor package.  
531 *Bioinformatics* **35**, 5346-5348 (2019).
- 532  
533 16. Mawlawi O, *et al.* Imaging human mesolimbic dopamine transmission with positron emission  
534 tomography: I. Accuracy and precision of D(2) receptor parameter measurements in ventral striatum.  
535 *Journal of cerebral blood flow and metabolism : official journal of the International Society of Cerebral*  
536 *Blood Flow and Metabolism* **21**, 1034-1057 (2001).
- 537  
538 17. McCutcheon R, Beck K, Jauhar S, Howes OD. Defining the Locus of Dopaminergic Dysfunction in  
539 Schizophrenia: A Meta-analysis and Test of the Mesolimbic Hypothesis. *Schizophr Bull* **44**, 1301-1311  
540 (2018).
- 541  
542 18. Kohli A, *et al.* Using Expectancy Theory to quantitatively dissociate the neural representation of  
543 motivation from its influential factors in the human brain: An fMRI study. *NeuroImage* **178**, 552-561  
544 (2018).
- 545  
546 19. Sacchet MD, Knutson B. Spatial smoothing systematically biases the localization of reward-related  
547 brain activity. *Neuroimage* **66**, 270-277 (2013).
- 548  
549 20. Yu G, Wang LG, Han Y, He QY. clusterProfiler: an R package for comparing biological themes among  
550 gene clusters. *OMICS* **16**, 284-287 (2012).
- 551  
552 21. Wu D, Smyth GK. Camera: a competitive gene set test accounting for inter-gene correlation. *Nucleic*  
553 *Acids Research* **40**, e133-e133 (2012).
- 554  
555
